# Supplementary material for: Pathological Computed Tomography Features Associated With Adverse Outcomes After Mild Traumatic Brain Injury: A TRACK-TBI Study With External Validation in CENTER-TBI
Source: PubMed Central journal article supplement (PMC8290344; doi:10.1001/jamaneurol.2021.2120), 2021-07-19
Supplement: jamaneurol-e212120-s001.pdf [file jamaneurol-e212120-s001.pdf]

## Supplemental Online Content

Yuh EL, Jain S, Sun X, et al; Pathological computed tomography features associated with adverse outcomes after mild traumatic brain injury: a TRACK-TBI study with external validation in CENTER-TBI. *JAMA Neurol*. Published online July 19, 2021. doi:10.1001/jamaneurol.2021.2120

**eTable 1.** TRACK-TBI and Center-TBI Study Sites

**eTable 2.** TRACK-TBI distribution of GOSE scores at 2 weeks, and at 3, 6, and 12 months for all 1602 subjects who attended at least 1 follow-up appointment

**eTable 3.** TRACK-TBI GEE model to assess association between isolated SAH and incomplete recovery (GOSE<8 vs. =8) at 2 weeks, 3, 6 and 12 months postinjury

**eTable 4.** TRACK-TBI GEE model to assess association between isolated SAH and unfavorable outcome (GOSE<5 vs. ≥5) at 2 weeks, 3, 6 and 12 months postinjury

**eTable 5.** TRACK-TBI association of demographic, baseline clinical, and CT phenotypes with incomplete recovery (GOSE<8 vs. =8) at 2 weeks, 3, 6 and 12 months postinjury after excluding all 41 patients who underwent surgical evacuation of intracranial hematoma.

**eTable 6.** CENTER-TBI demographic and baseline clinical characteristics by head CT status (N=2594)

**eTable 7.** CENTER-TBI association of demographic, baseline clinical, and CT phenotypes with incomplete recovery (GOSE<8 vs. =8) at 3, 6 and 12 months postinjury.

**eTable 8.** CENTER-TBI association of demographic, baseline clinical, and CT features with unfavorable outcome (GOSE<5 vs. ≥5) at 3, 6 and 12 months postinjury.

**eFigure 1.** Recruitment and retention flowchart

**eFigure 2.** TRACK-TBI - Multiple Correspondence Analysis (MCA) of CT predictors

**eFigure 3.** CENTER-TBI Multiple Correspondence Analysis (MCA) of CT predictors

This supplemental material has been provided by the authors to give readers additional information about their work.

| <b>eTable 1. TRACK-TBI Study Sites</b>                                                                                                                   |
|----------------------------------------------------------------------------------------------------------------------------------------------------------|
| <b>Transforming Clinical Knowledge in Traumatic Brain Injury (TRACK-TBI) sites</b>                                                                       |
| Ben Taub General Hospital in Houston, TX                                                                                                                 |
| Massachusetts General Hospital in Boston, MA                                                                                                             |
| Zuckerberg San Francisco General in San Francisco, CA                                                                                                    |
| University of Cincinnati Medical Center in Cincinnati, OH                                                                                                |
| R. Adams Cowley Shock Trauma Center in Baltimore, MD                                                                                                     |
| Ryder Trauma Center in Miami, FL                                                                                                                         |
| University of Pittsburgh Medical Center in Pittsburgh, PA                                                                                                |
| Seton Medical Center in Austin, TX                                                                                                                       |
| Parkland Memorial Hospital in Dallas, TX                                                                                                                 |
| Harborview Medical Center in Seattle, WA                                                                                                                 |
| Virginia Commonwealth University Medical Center in Richmond, VA                                                                                          |
| University of Pennsylvania Health System in Philadelphia, PA                                                                                             |
| Emory Healthcare in Atlanta, GA                                                                                                                          |
| Medical College of Wisconsin in Milwaukee, WI                                                                                                            |
| University of Utah Health in Salt Lake City, UT                                                                                                          |
| Indiana University Health in Indianapolis, IN                                                                                                            |
| Hennepin County Medical Center in Minneapolis, MN                                                                                                        |
| Denver Health in Denver, CO                                                                                                                              |
| <b>Collaborative European NeuroTrauma effectiveness research in traumatic brain injury (CENTER-TBI) sites: <i>Please see Maas et al.</i><sup>9</sup></b> |

**eTable 2. TRACK-TBI distribution of GOSE scores at 2 weeks, and at 3, 6, and 12 months for all 1602 subjects who attended at least 1 follow-up appointment**

|       | W02          | M03          | M06          | M12          |
|-------|--------------|--------------|--------------|--------------|
| 1     | 14 (0.94%)   | 19 (1.38%)   | 24 (1.83%)   | 29 (2.33%)   |
| 2     | 5 (0.33%)    | 0 (0%)       | 0 (0%)       | 0 (0%)       |
| 3     | 85 (5.68%)   | 16 (1.16%)   | 11 (0.84%)   | 7 (0.56%)    |
| 4     | 76 (5.08%)   | 22 (1.59%)   | 12 (0.92%)   | 8 (0.64%)    |
| 5     | 378 (25.25%) | 172 (12.45%) | 97 (7.4%)    | 84 (6.76%)   |
| 6     | 312 (20.84%) | 267 (19.33%) | 244 (18.61%) | 199 (16.01%) |
| 7     | 311 (20.77%) | 381 (27.59%) | 399 (30.43%) | 327 (26.31%) |
| 8     | 316 (21.11%) | 504 (36.5%)  | 524 (39.97%) | 589 (47.39%) |
| Total | 1497 (100%)  | 1381 (100%)  | 1311 (100%)  | 1243 (100%)  |

**eTable 3. TRACK-TBI GEE model to assess association between isolated SAH and incomplete recovery (GOSE<8 vs. =8) at 2 weeks, 3, 6 and 12 months postinjury**

|              |          | OR    | 95% CI         | p-value |
|--------------|----------|-------|----------------|---------|
| Isolated SAH | Week 2   | 2.009 | (1.192, 3.387) | 0.009   |
|              | Month 3  | 1.529 | (0.997, 2.346) | 0.052   |
|              | Month 6  | 1.568 | (1.011, 2.432) | 0.045   |
|              | Month 12 | 1.355 | (0.904, 2.029) | 0.141   |

**eTable 4. TRACK-TBI GEE model to assess association between isolated SAH and unfavorable outcome (GOSE<5 vs. ≥5) at 2 weeks, 3, 6 and 12 months postinjury**

|              |          | OR    | 95% CI         | p-value |
|--------------|----------|-------|----------------|---------|
| Isolated SAH | Week 2   | 1.305 | (0.683, 2.492) | 0.420   |
|              | Month 3  | 0.476 | (0.106, 2.144) | 0.334   |
|              | Month 6  | 1.122 | (0.317, 3.976) | 0.859   |
|              | Month 12 | 0.410 | (0.042, 4.016) | 0.444   |

Generalized estimating equation (GEE) models were used to study the association of isolated SAH with incomplete recovery (GOSE<8 vs. =8) and with unfavorable outcome (GOSE<5 vs. ≥5) at 2 weeks, 3, 6, and 12 months postinjury. The models were adjusted for demographic and baseline clinical characteristics (age, gender, race/ethnicity, years of education, prior TBI, and neuropsychiatric history).

**eTable 5. TRACK-TBI association of demographic, baseline clinical, and CT phenotypes with incomplete recovery (GOSE<8 vs. = 8) at 2 weeks, 3, 6 and 12 months postinjury after excluding all 41 patients who underwent surgical evacuation of intracranial hematoma.**

(GEE model for GOSE<5 after all 41 cases of hemicraniotomy/hemicraniectomy could not be created, since there was only 1 patient with EDH who had GOSE<5 at any timepoint between 3 months and 1 year.)

| Predictors                               |          | OR    | 95% CI         | p-value |
|------------------------------------------|----------|-------|----------------|---------|
| <b>CT Phenotypes</b>                     |          |       |                |         |
| Contusion/SAH/SDH                        | Week 2   | 2.125 | (1.539, 2.935) | <0.001  |
|                                          | Month 3  | 1.771 | (1.353, 2.317) | <0.001  |
|                                          | Month 6  | 1.627 | (1.245, 2.125) | <0.001  |
|                                          | Month 12 | 1.735 | (1.335, 2.256) | <0.001  |
| EDH                                      | Week 2   | 2.484 | (1.019, 6.059) | 0.045   |
|                                          | Month 3  | 2.269 | (1.160, 4.437) | 0.017   |
|                                          | Month 6  | 1.118 | (0.609, 2.053) | 0.719   |
|                                          | Month 12 | 1.243 | (0.702, 2.200) | 0.455   |
| IVH/Petechial Hemorrhage                 | Week 2   | 2.191 | (1.084, 4.428) | 0.029   |
|                                          | Month 3  | 1.119 | (0.665, 1.885) | 0.672   |
|                                          | Month 6  | 1.126 | (0.691, 1.834) | 0.633   |
|                                          | Month 12 | 1.406 | (0.864, 2.289) | 0.171   |
| <b>Demographics</b>                      |          |       |                |         |
| Age (55 vs 26)                           |          | 1.163 | (0.997, 1.356) | 0.054   |
| Years of Education (16 vs 12)            |          | 0.652 | (0.572, 0.743) | <0.001  |
| Sex (Male vs Female)                     |          | 0.583 | (0.484, 0.703) | <0.001  |
| Race (White vs Black)                    |          | 0.761 | (0.592, 0.979) | 0.084   |
| Race (White vs Other)                    |          | 1.239 | (0.905, 1.696) | 0.375   |
| Ethnicity (Hispanic vs Non-Hispanic)     |          | 1.089 | (0.842, 1.406) | 0.517   |
| <b>Baseline Clinical Characteristics</b> |          |       |                |         |
| Neuropsychiatric history (Yes vs No)     |          | 1.599 | (1.296, 1.973) | <0.001  |
| Prior TBI (Yes vs No)                    |          | 1.358 | (1.132, 1.629) | 0.001   |

Generalized estimating equation (GEE) model was used to study the association of demographics, clinical, and CT predictors with incomplete recovery (GOSE<8 vs. =8) at 2 weeks, 3, 6, and 12 months postinjury after excluding all 41 patients who underwent surgical

| <b>eTable 6. CENTER-TBI demographic and baseline clinical characteristics by head CT status (N=2594)</b> |                                                            |                            |                |
|----------------------------------------------------------------------------------------------------------|------------------------------------------------------------|----------------------------|----------------|
|                                                                                                          | <b>Initial head CT with acute intracranial abnormality</b> |                            | <b>p-value</b> |
|                                                                                                          | <b>CT negative</b>                                         | <b>CT positive (row %)</b> |                |
| <b>Gender</b>                                                                                            |                                                            |                            |                |
| Male N = 1658 (63.9%)                                                                                    | 878 (53.0%)                                                | 780 (47.0%)                | 0.019*         |
| Female N = 936 (36.1%)                                                                                   | 541 (57.8%)                                                | 395 (42.2%)                |                |
| <b>Total N = 2594</b>                                                                                    | <b>1419 (54.7%)</b>                                        | <b>1175 (45.3%)</b>        |                |

evacuation of intracranial hematoma. The model included GOSE (<8 vs. =8) at each follow-up as the outcome; predictors included demographics, baseline clinical characteristics, CT phenotypes, timepoints, and interaction between CT phenotypes and timepoints. An unstructured working correlation matrix was used. Note for the continuous predictors (age and years of education), we reported OR comparing its third quartile vs. first quartile. The marginal R<sup>2</sup> of the GEE model was 8.9% without CT predictors and 10.7% with CT predictors.

|                                                                                                  |                  |                                           |                                           |            |
|--------------------------------------------------------------------------------------------------|------------------|-------------------------------------------|-------------------------------------------|------------|
| <b>Race</b>                                                                                      |                  |                                           |                                           |            |
| White                                                                                            | N = 2448 (97.0%) | 1344 (54.9%)                              | 1104 (45.1%)                              | 0.041*     |
| Black                                                                                            | N = 37 (1.5%)    | 28 (75.7%)                                | 9 (24.3%)                                 |            |
| Other                                                                                            | N = 39 (1.5%)    | 22 (56.4%)                                | 17 (43.6%)                                |            |
| <b>Total</b>                                                                                     | <b>N = 2524</b>  | <b>1394 (55.2%)</b>                       | <b>1130 (44.8%)</b>                       |            |
| <b>Hispanic</b>                                                                                  |                  |                                           |                                           |            |
| No                                                                                               | N = 2479 (98.2%) | 1374 (55.4%)                              | 1105 (44.6%)                              | 0.188      |
| Yes                                                                                              | N = 45 (1.8%)    | 20 (44.4%)                                | 25 (55.6%)                                |            |
| <b>Total</b>                                                                                     | <b>N = 2524</b>  | <b>1394 (55.2%)</b>                       | <b>1130 (44.8%)</b>                       |            |
| <b>Neuropsychiatric history</b>                                                                  |                  |                                           |                                           |            |
| No                                                                                               | N = 2197 (85.5%) | 1207 (54.9%)                              | 990 (45.1%)                               | 0.94       |
| Yes                                                                                              | N = 372 (14.5%)  | 203 (54.6%)                               | 169 (45.4%)                               |            |
| <b>Total</b>                                                                                     | <b>N = 2569</b>  | <b>1410 (54.9%)</b>                       | <b>1159 (45.1%)</b>                       |            |
| <b>Prior TBI</b>                                                                                 |                  |                                           |                                           |            |
| Yes                                                                                              | N = 282 (11.3%)  | 188 (66.7%)                               | 94 (33.3%)                                | <0.001***  |
| No                                                                                               | N = 2212 (88.7%) | 1182 (53.4%)                              | 1030 (46.6%)                              |            |
| <b>Total</b>                                                                                     | <b>N = 2494</b>  | <b>1370 (54.9%)</b>                       | <b>1124 (45.1%)</b>                       |            |
| <b>Care pathway</b>                                                                              |                  |                                           |                                           |            |
| ED Discharge                                                                                     | N = 772 (29.8%)  | 686 (88.9%)                               | 86 (11.1%)                                | <0.001***  |
| Hospital admission, no ICU                                                                       | N = 1211 (46.7%) | 620 (51.2%)                               | 591 (48.8%)                               |            |
| Hospital admission with ICU                                                                      | N = 611 (23.6%)  | 113 (18.5%)                               | 498 (81.5%)                               |            |
| <b>Total</b>                                                                                     | <b>N = 2594</b>  | <b>1419 (54.7%)</b>                       | <b>1175 (45.3%)</b>                       |            |
| <b>Age</b>                                                                                       |                  |                                           |                                           |            |
| Mean ± S.D. (Overall 51.8 ± 20.3 years)<br>[Min, Q1, Median, Q3, Max] (Overall [17,35,53,68,96]) |                  | 49.0 ± 20.3 years<br>[17, 30, 49, 65, 94] | 55.2 ± 19.7 years<br>[17, 40, 58, 71, 96] | <0.001**** |
| <b>Education</b>                                                                                 |                  |                                           |                                           |            |
| Mean ± S.D. (Overall 13.5 ± 4.1)<br>[Min, Q1, Median, Q3, Max] (Overall [1,11,13,16,30])         |                  | 13.7 ± 4.1 years<br>[1,11,13,16,30]       | 13.3 ± 4.1 years<br>[3,11,13,16,30]       | 0.021*     |

**eTable 7.** CENTER-TBI association of demographic, baseline clinical, and CT phenotypes with incomplete recovery (GOSE<8 vs. = 8) at 3, 6 and 12 months postinjury.

| Predictors                               |          | OR    | 95% CI         | p-value   |
|------------------------------------------|----------|-------|----------------|-----------|
| <b>CT Phenotypes</b>                     |          |       |                |           |
| Contusion/SAH/SDH                        | Month 3  | 2.165 | (1.737, 2.699) | <0.001*** |
|                                          | Month 6  | 2.404 | (1.940, 2.979) | <0.001*** |
|                                          | Month 12 | 2.725 | (2.181, 3.405) | <0.001*** |
| EDH                                      | Month 3  | 1.529 | (0.994, 2.351) | 0.053     |
|                                          | Month 6  | 1.491 | (0.980, 2.271) | 0.062     |
|                                          | Month 12 | 1.549 | (1.015, 2.364) | 0.043*    |
| IVH/Petechial Hemorrhage                 | Month 3  | 1.525 | (0.963, 2.417) | 0.072     |
|                                          | Month 6  | 1.545 | (0.997, 2.394) | 0.051     |
|                                          | Month 12 | 1.707 | (1.114, 2.617) | 0.014*    |
| <b>Demographics</b>                      |          |       |                |           |
| Age (55 vs 26)                           |          | 1.226 | (1.072, 1.401) | 0.003**   |
| Years of Education (16 vs 12)            |          | 1.009 | (0.929, 1.096) | 0.835     |
| Sex (Male vs Female)                     |          | 0.78  | (0.653, 0.931) | 0.006**   |
| Race (White vs Black)                    |          | 0.439 | (0.234, 0.824) | 0.028*    |
| Race (White vs Other)                    |          | 0.759 | (0.379, 1.518) | 0.715     |
| Ethnicity (Hispanic vs Non-Hispanic)     |          | 1.82  | (0.939, 3.528) | 0.076     |
| <b>Baseline Clinical Characteristics</b> |          |       |                |           |
| Neuropsychiatric history (Yes vs No)     |          | 2.032 | (1.589, 2.599) | <0.001*** |
| Prior TBI (Yes vs No)                    |          | 1.052 | (0.812, 1.363) | 0.701     |

Generalized estimating equation (GEE) model was used to study the association of demographics, clinical, and CT predictors with incomplete recovery (GOSE<8 vs. =8) at 3, 6, and 12 months postinjury. The model included GOSE (<8 vs. =8) at each follow-up as the outcome; predictors included demographics, baseline clinical characteristics, CT phenotypes, timepoints, and interaction between CT phenotypes and timepoints. An unstructured working correlation matrix was used. Note for the continuous predictors (age and years of education), we reported OR comparing the third quartile vs. first quartile values taken from the TRACK-TBI sample distribution. The marginal  $R^2$  of the GEE model was 5.0% without CT predictors and 10.2% with CT predictors.



**eTable 8.** CENTER-TBI association of demographic, baseline clinical, and CT features with unfavorable outcome (GOSE<5 vs. ≥5) at 3, 6 and 12 months postinjury.

| Predictors                               |          | OR    | 95% CI         | p-value   |
|------------------------------------------|----------|-------|----------------|-----------|
| <b>CT Phenotypes</b>                     |          |       |                |           |
| Contusion/SAH/SDH                        | Month 3  | 1.995 | (1.443, 2.758) | <0.001*** |
|                                          | Month 6  | 1.638 | (1.131, 2.37)  | 0.009**   |
|                                          | Month 12 | 1.675 | (1.129, 2.486) | 0.01**    |
| EDH                                      | Month 3  | 1.487 | (0.8, 2.765)   | 0.21      |
|                                          | Month 6  | 1.192 | (0.556, 2.554) | 0.652     |
|                                          | Month 12 | 1.091 | (0.461, 2.583) | 0.844     |
| IVH/Petechial Hemorrhage                 | Month 3  | 1.945 | (1.165, 3.246) | 0.011*    |
|                                          | Month 6  | 1.869 | (1.054, 3.312) | 0.032*    |
|                                          | Month 12 | 1.815 | (1.001, 3.289) | 0.049*    |
| <b>Demographics</b>                      |          |       |                |           |
| Age (55 vs 26)                           |          | 3.193 | (2.336, 4.364) | <0.001    |
| Years of Education (16 vs 12)            |          | 0.797 | (0.687, 0.925) | 0.003     |
| Sex (Male vs Female)                     |          | 0.969 | (0.71, 1.321)  | 0.841     |
| Race (White vs Black)                    |          | 0.423 | (0.139, 1.284) | 0.282     |
| Race (White vs Other)                    |          | 1.091 | (0.161, 7.373) | 0.996     |
| Ethnicity (Hispanic vs Non-Hispanic)     |          | 1.021 | (0.257, 4.064) | 0.976     |
| <b>Baseline Clinical Characteristics</b> |          |       |                |           |
| Neuropsychiatric history (Yes vs No)     |          | 2.058 | (1.41, 3.005)  | <0.001*** |
| Prior TBI (Yes vs No)                    |          | 0.42  | (0.229, 0.77)  | 0.005**   |

Generalized estimating equation (GEE) model was used to study the association of demographics, clinical, and CT predictors with unfavorable outcome (GOSE<5 vs. ≥5) at 3, 6, and 12 months postinjury. The model included GOSE (<5 vs. ≥5) at each follow-up as the outcome; predictors included demographics, baseline clinical characteristics, CT phenotypes, timepoints, and interaction between CT phenotypes and timepoints. An unstructured working correlation matrix was used. Note for the continuous predictors (age and years of education), we reported OR comparing the third quartile vs. first quartile values taken from the TRACK-TBI sample distribution. The marginal R<sup>2</sup> of the GEE model was 9.0% without CT predictors and 11.0% with CT predictors.

**eFigure 1.** Recruitment and retention flowchart

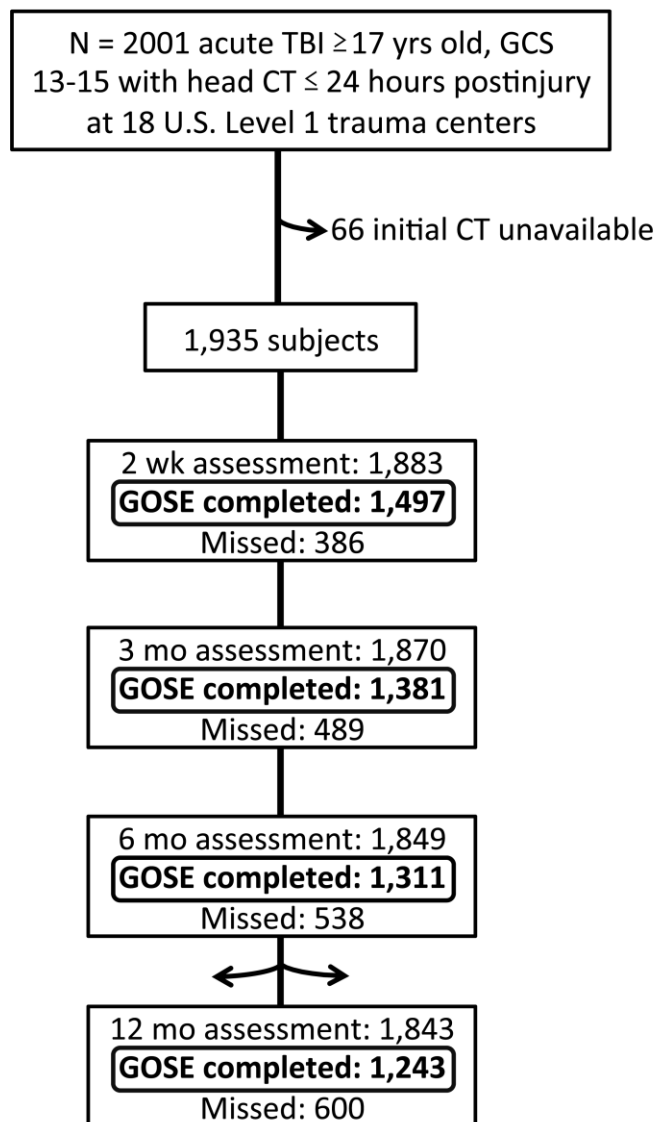

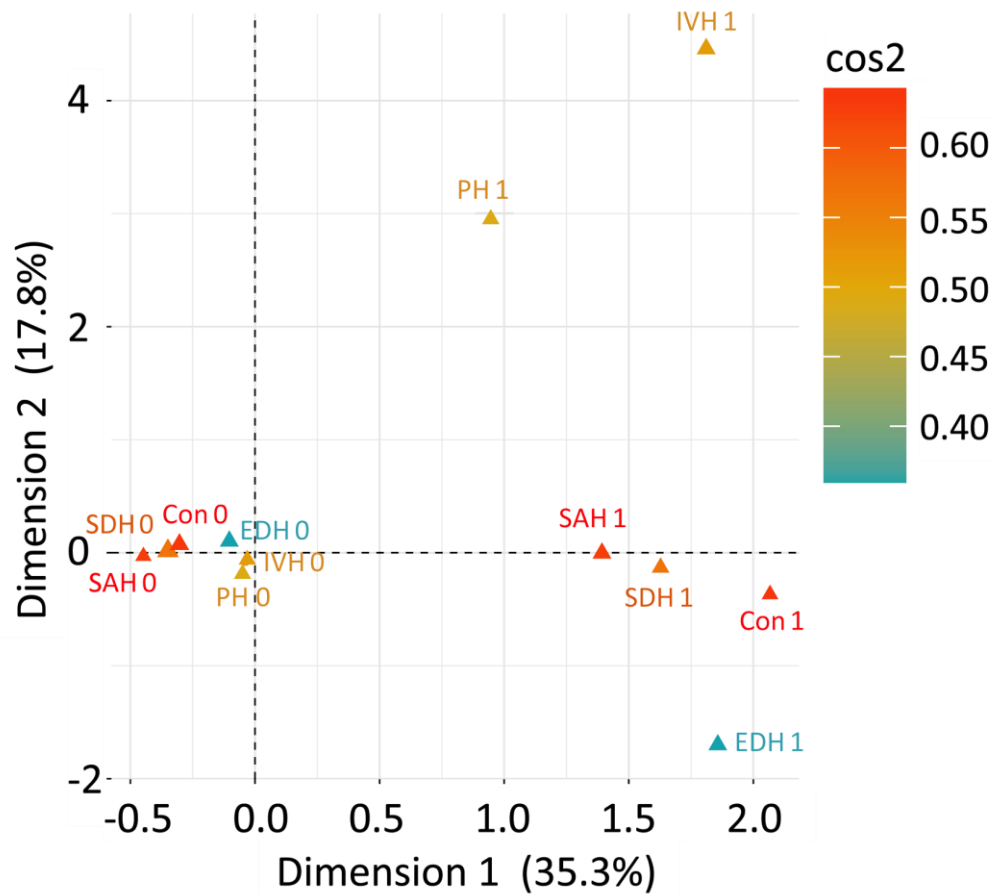

**eFigure 2. TRACK-TBI - Multiple Correspondence Analysis (MCA) of CT predictors** on all subjects (N=1935) recapitulates the hierarchical cluster analysis (HCA) results in the inset in the left upper corner of Figure 2. MCA shows the relationship between the CT categories. Categories with a similar profile are grouped together. The quality of representation ( $\cos^2$ ) measures the degree of association between the CT categories and a particular axis. Con – contusion, EDH – epidural hematoma, IVH – intraventricular hemorrhage, PH – petechial hemorrhage, SAH – subarachnoid hemorrhage, SDH – subdural hematoma.

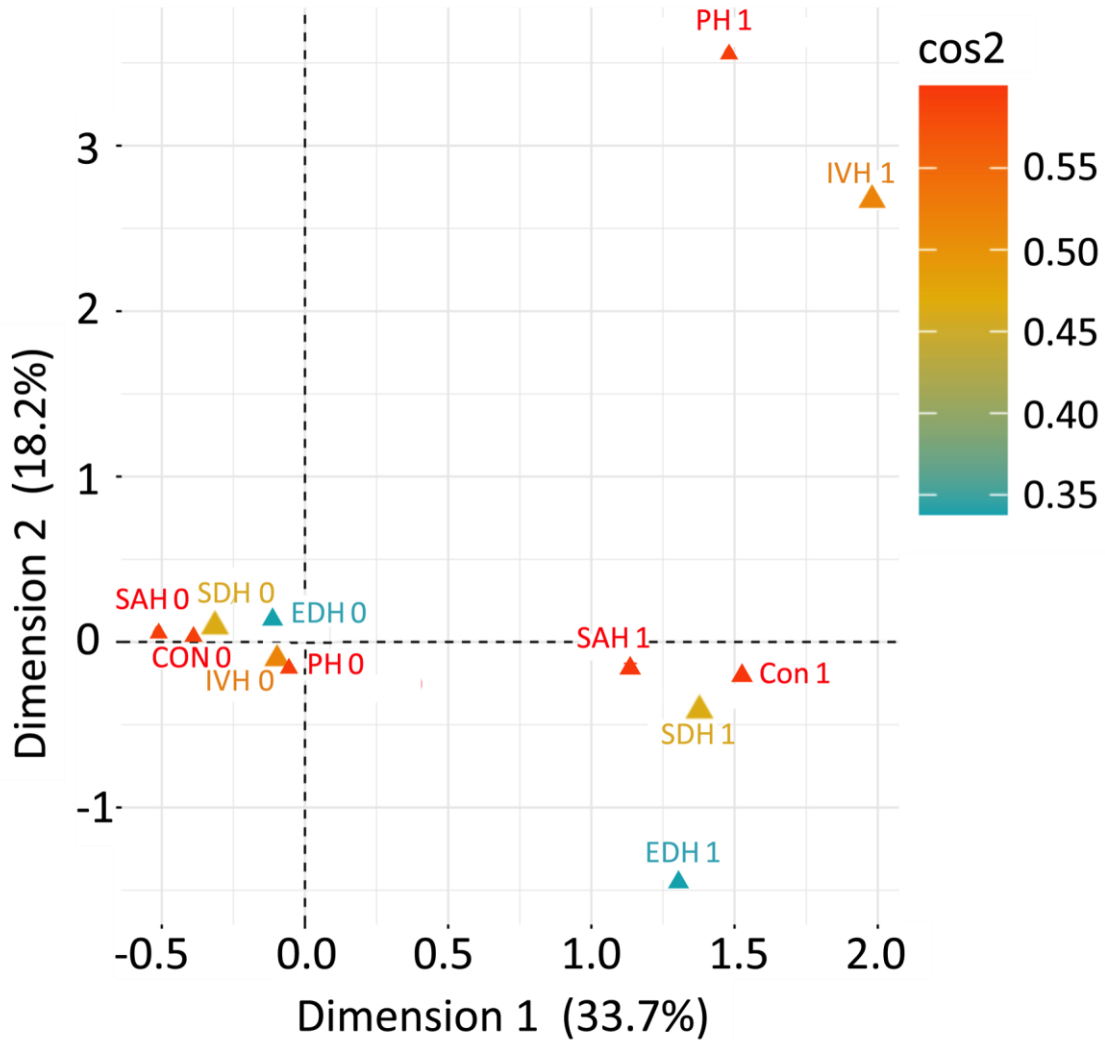

**eFigure 3. CENTER-TBI Multiple Correspondence Analysis (MCA) of CT predictors** on all subjects (N=2594) recapitulates the hierarchical cluster analysis (HCA) results in the inset in the left upper corner of eFigure 3. MCA shows the relationship between the CT categories. Categories with a similar profile are grouped together. The quality of representation (cos2) measures the degree of association between the CT categories and a particular axis. Con – contusion, EDH – epidural hematoma, IVH – intraventricular hemorrhage, PH – petechial hemorrhage, SAH – subarachnoid hemorrhage, SDH – subdural hematoma.
