# Supplementary material for: Pathological Computed Tomography Features Associated With Adverse Outcomes After Mild Traumatic Brain Injury: A TRACK-TBI Study With External Validation in CENTER-TBI
Source: PubMed Central journal article supplement (PMC8290344; doi:10.1001/jamaneurol.2021.2120), 2021-07-19
Supplement: jamaneurol-e212120-s002.pdf [file jamaneurol-e212120-s002.pdf]

| <b>Group Name(s): CENTER-TBI Investigators</b> |                  |                             |                         |                    |                                                 |                                                                |                                                                                                   |
|------------------------------------------------|------------------|-----------------------------|-------------------------|--------------------|-------------------------------------------------|----------------------------------------------------------------|---------------------------------------------------------------------------------------------------|
| <b>First Name and Middle Initial(s)</b>        | <b>Last Name</b> | <b>Suffix (eg, Jr, III)</b> | <b>Academic Degrees</b> | <b>Institution</b> | <b>Location (city, state/province, country)</b> | <b>Role or Contribution, eg, chair, principal investigator</b> | <b>Group (if more than 1 Group listed in the byline) and/or Subgroup (eg, Steering Committee)</b> |
| Krisztina                                      | Amrein           |                             |                         |                    |                                                 |                                                                |                                                                                                   |
| Nada                                           | Andelic          |                             |                         |                    |                                                 |                                                                |                                                                                                   |
| Lasse                                          | Andreassen       |                             |                         |                    |                                                 |                                                                |                                                                                                   |
| Audny                                          | Anke             |                             |                         |                    |                                                 |                                                                |                                                                                                   |
| Anna                                           | Antoni           |                             |                         |                    |                                                 |                                                                |                                                                                                   |
| Gérard                                         | Audibert         |                             |                         |                    |                                                 |                                                                |                                                                                                   |
| Philippe                                       | Azouvi           |                             |                         |                    |                                                 |                                                                |                                                                                                   |
| Maria Luisa                                    | Azzolini         |                             |                         |                    |                                                 |                                                                |                                                                                                   |
| Ronald                                         | Bartels          |                             |                         |                    |                                                 |                                                                |                                                                                                   |
| Pál                                            | Barzó            |                             |                         |                    |                                                 |                                                                |                                                                                                   |
| Romuald                                        | Beauvais         |                             |                         |                    |                                                 |                                                                |                                                                                                   |
| Ronny                                          | Beer             |                             |                         |                    |                                                 |                                                                |                                                                                                   |
| Bo-Michael                                     | Bellander        |                             |                         |                    |                                                 |                                                                |                                                                                                   |
| Antonio                                        | Belli            |                             |                         |                    |                                                 |                                                                |                                                                                                   |
| Habib                                          | Benal            |                             |                         |                    |                                                 |                                                                |                                                                                                   |
| Maurizio                                       | Berardino        |                             |                         |                    |                                                 |                                                                |                                                                                                   |
| Luigi                                          | Beretta          |                             |                         |                    |                                                 |                                                                |                                                                                                   |
| Morten                                         | Blaabjerg        |                             |                         |                    |                                                 |                                                                |                                                                                                   |
| Peter                                          | Bragge           |                             |                         |                    |                                                 |                                                                |                                                                                                   |
| Alexandra                                      | Brazinova        |                             |                         |                    |                                                 |                                                                |                                                                                                   |
| Vibeke                                         | Brinck           |                             |                         |                    |                                                 |                                                                |                                                                                                   |
| Joanne                                         | Brooker          |                             |                         |                    |                                                 |                                                                |                                                                                                   |
| Camilla                                        | Brorsson         |                             |                         |                    |                                                 |                                                                |                                                                                                   |
| Andras                                         | Buki             |                             |                         |                    |                                                 |                                                                |                                                                                                   |
| Monika                                         | Bullinger        |                             |                         |                    |                                                 |                                                                |                                                                                                   |
| Manuel                                         | Cabeleira        |                             |                         |                    |                                                 |                                                                |                                                                                                   |
| Alessio                                        | Caccioppola      |                             |                         |                    |                                                 |                                                                |                                                                                                   |
| Emiliana                                       | Calappi          |                             |                         |                    |                                                 |                                                                |                                                                                                   |

## Supplemental Online Content: Nonauthor Collaborators

| First Name and Middle Initial(s) | Last Name       | Suffix (eg, Jr, III) | Academic Degrees | Institution | Location (city, state/province, country) | Role or Contribution, eg, chair, principal investigator | Group (if more than 1 Group listed in the byline) and/or Subgroup (eg, Steering Committee) |
|----------------------------------|-----------------|----------------------|------------------|-------------|------------------------------------------|---------------------------------------------------------|--------------------------------------------------------------------------------------------|
| Maria Rosa                       | Calvi           |                      |                  |             |                                          |                                                         |                                                                                            |
| Peter                            | Cameron         |                      |                  |             |                                          |                                                         |                                                                                            |
| Guillermo                        | Carbayo Lozano  |                      |                  |             |                                          |                                                         |                                                                                            |
| Marco                            | Carbonara       |                      |                  |             |                                          |                                                         |                                                                                            |
| Ana M.                           | Castaño-León    |                      |                  |             |                                          |                                                         |                                                                                            |
| Simona                           | Cavallo         |                      |                  |             |                                          |                                                         |                                                                                            |
| Giorgio                          | Chevallard      |                      |                  |             |                                          |                                                         |                                                                                            |
| Arturo                           | Chierogato      |                      |                  |             |                                          |                                                         |                                                                                            |
| Giuseppe                         | Citerio         |                      |                  |             |                                          |                                                         |                                                                                            |
| Hans                             | Clusmann        |                      |                  |             |                                          |                                                         |                                                                                            |
| Mark                             | Coburn          |                      |                  |             |                                          |                                                         |                                                                                            |
| Jonathan                         | Coles           |                      |                  |             |                                          |                                                         |                                                                                            |
| Jamie D.                         | Cooper          |                      |                  |             |                                          |                                                         |                                                                                            |
| Marta                            | Correia         |                      |                  |             |                                          |                                                         |                                                                                            |
| Amra                             | Čović           |                      |                  |             |                                          |                                                         |                                                                                            |
| Nicola                           | Curry           |                      |                  |             |                                          |                                                         |                                                                                            |
| Endre                            | Czeiter         |                      |                  |             |                                          |                                                         |                                                                                            |
| Marek                            | Czosnyka        |                      |                  |             |                                          |                                                         |                                                                                            |
| Claire                           | Dahyot-Fizelier |                      |                  |             |                                          |                                                         |                                                                                            |
| Paul                             | Dark            |                      |                  |             |                                          |                                                         |                                                                                            |
| Helen                            | Dawes           |                      |                  |             |                                          |                                                         |                                                                                            |
| Véronique                        | De Keyser       |                      |                  |             |                                          |                                                         |                                                                                            |
| Vincent                          | Degos           |                      |                  |             |                                          |                                                         |                                                                                            |
| Francesco                        | Della Corte     |                      |                  |             |                                          |                                                         |                                                                                            |
| Hugo                             | den Boogert     |                      |                  |             |                                          |                                                         |                                                                                            |
| Bart                             | Depreitere      |                      |                  |             |                                          |                                                         |                                                                                            |
| Đula                             | Đilvesi         |                      |                  |             |                                          |                                                         |                                                                                            |
| Abhishek                         | Dixit           |                      |                  |             |                                          |                                                         |                                                                                            |

## Supplemental Online Content: Nonauthor Collaborators

| First Name and Middle Initial(s) | Last Name   | Suffix (eg, Jr, III) | Academic Degrees | Institution | Location (city, state/province, country) | Role or Contribution, eg, chair, principal investigator | Group (if more than 1 Group listed in the byline) and/or Subgroup (eg, Steering Committee) |
|----------------------------------|-------------|----------------------|------------------|-------------|------------------------------------------|---------------------------------------------------------|--------------------------------------------------------------------------------------------|
| Emma                             | Donoghue    |                      |                  |             |                                          |                                                         |                                                                                            |
| Jens                             | Dreier      |                      |                  |             |                                          |                                                         |                                                                                            |
| Guy-Loup                         | Dulière     |                      |                  |             |                                          |                                                         |                                                                                            |
| Ari                              | Ercole      |                      |                  |             |                                          |                                                         |                                                                                            |
| Patrick                          | Esser       |                      |                  |             |                                          |                                                         |                                                                                            |
| Erzsébet                         | Ezer        |                      |                  |             |                                          |                                                         |                                                                                            |
| Martin                           | Fabricius   |                      |                  |             |                                          |                                                         |                                                                                            |
| Valery L.                        | Feigin      |                      |                  |             |                                          |                                                         |                                                                                            |
| Kelly                            | Foks        |                      |                  |             |                                          |                                                         |                                                                                            |
| Shirin                           | Frisvold    |                      |                  |             |                                          |                                                         |                                                                                            |
| Alex                             | Furmanov    |                      |                  |             |                                          |                                                         |                                                                                            |
| Pablo                            | Gagliardo   |                      |                  |             |                                          |                                                         |                                                                                            |
| Damien                           | Galanaud    |                      |                  |             |                                          |                                                         |                                                                                            |
| Dashiell                         | Gantner     |                      |                  |             |                                          |                                                         |                                                                                            |
| Guoyi                            | Gao         |                      |                  |             |                                          |                                                         |                                                                                            |
| Pradeep                          | George      |                      |                  |             |                                          |                                                         |                                                                                            |
| Alexandre                        | Ghuysen     |                      |                  |             |                                          |                                                         |                                                                                            |
| Lelde                            | Giga        |                      |                  |             |                                          |                                                         |                                                                                            |
| Ben                              | Glocker     |                      |                  |             |                                          |                                                         |                                                                                            |
| Jagoš                            | Golubovic   |                      |                  |             |                                          |                                                         |                                                                                            |
| Pedro A.                         | Gomez       |                      |                  |             |                                          |                                                         |                                                                                            |
| Johannes                         | Gratz       |                      |                  |             |                                          |                                                         |                                                                                            |
| Benjamin                         | Gravesteijn |                      |                  |             |                                          |                                                         |                                                                                            |
| Francesca                        | Grossi      |                      |                  |             |                                          |                                                         |                                                                                            |
| Russell L.                       | Gruen       |                      |                  |             |                                          |                                                         |                                                                                            |
| Deepak                           | Gupta       |                      |                  |             |                                          |                                                         |                                                                                            |
| Juanita A.                       | Haagsma     |                      |                  |             |                                          |                                                         |                                                                                            |
| Iain                             | Haitsma     |                      |                  |             |                                          |                                                         |                                                                                            |
| Raimund                          | Helbok      |                      |                  |             |                                          |                                                         |                                                                                            |

## Supplemental Online Content: Nonauthor Collaborators

| First Name and Middle Initial(s) | Last Name     | Suffix (eg, Jr, III) | Academic Degrees | Institution | Location (city, state/province, country) | Role or Contribution, eg, chair, principal investigator | Group (if more than 1 Group listed in the byline) and/or Subgroup (eg, Steering Committee) |
|----------------------------------|---------------|----------------------|------------------|-------------|------------------------------------------|---------------------------------------------------------|--------------------------------------------------------------------------------------------|
| Eirik                            | Helseth       |                      |                  |             |                                          |                                                         |                                                                                            |
| Lindsay                          | Horton        |                      |                  |             |                                          |                                                         |                                                                                            |
| Jilske                           | Huijben       |                      |                  |             |                                          |                                                         |                                                                                            |
| Peter J.                         | Hutchinson    |                      |                  |             |                                          |                                                         |                                                                                            |
| Bram                             | Jacobs        |                      |                  |             |                                          |                                                         |                                                                                            |
| Stefan                           | Jankowski     |                      |                  |             |                                          |                                                         |                                                                                            |
| Mike                             | Jarrett       |                      |                  |             |                                          |                                                         |                                                                                            |
| Ji-yao                           | Jiang         |                      |                  |             |                                          |                                                         |                                                                                            |
| Faye                             | Johnson       |                      |                  |             |                                          |                                                         |                                                                                            |
| Kelly                            | Jones         |                      |                  |             |                                          |                                                         |                                                                                            |
| Mladen                           | Karan         |                      |                  |             |                                          |                                                         |                                                                                            |
| Cecilia                          | Kerlund       |                      |                  |             |                                          |                                                         |                                                                                            |
| Angelos G.                       | Kolias        |                      |                  |             |                                          |                                                         |                                                                                            |
| Erwin                            | Kompanje      |                      |                  |             |                                          |                                                         |                                                                                            |
| Daniel                           | Kondziella    |                      |                  |             |                                          |                                                         |                                                                                            |
| Evgenios                         | Kornaropoulos |                      |                  |             |                                          |                                                         |                                                                                            |
| Lars-Owe                         | Koskinen      |                      |                  |             |                                          |                                                         |                                                                                            |
| Noémi                            | Kovács        |                      |                  |             |                                          |                                                         |                                                                                            |
| Ana                              | Kowark        |                      |                  |             |                                          |                                                         |                                                                                            |
| Alfonso                          | Lagares       |                      |                  |             |                                          |                                                         |                                                                                            |
| Linda                            | Lanyon        |                      |                  |             |                                          |                                                         |                                                                                            |
| Steven                           | Laureys       |                      |                  |             |                                          |                                                         |                                                                                            |
| Fiona                            | Lecky         |                      |                  |             |                                          |                                                         |                                                                                            |
| Didier                           | Ledoux        |                      |                  |             |                                          |                                                         |                                                                                            |
| Rolf                             | Lefering      |                      |                  |             |                                          |                                                         |                                                                                            |
| Valerie                          | Legrand       |                      |                  |             |                                          |                                                         |                                                                                            |
| Aurelie                          | Lejeune       |                      |                  |             |                                          |                                                         |                                                                                            |
| Leon                             | Levi          |                      |                  |             |                                          |                                                         |                                                                                            |
| Roger                            | Lightfoot     |                      |                  |             |                                          |                                                         |                                                                                            |

## Supplemental Online Content: Nonauthor Collaborators

| First Name and Middle Initial(s) | Last Name     | Suffix (eg, Jr, III) | Academic Degrees | Institution | Location (city, state/province, country) | Role or Contribution, eg, chair, principal investigator | Group (if more than 1 Group listed in the byline) and/or Subgroup (eg, Steering Committee) |
|----------------------------------|---------------|----------------------|------------------|-------------|------------------------------------------|---------------------------------------------------------|--------------------------------------------------------------------------------------------|
| Marc                             | Maegele       |                      |                  |             |                                          |                                                         |                                                                                            |
| Marek                            | Majdan        |                      |                  |             |                                          |                                                         |                                                                                            |
| Alex                             | Manara        |                      |                  |             |                                          |                                                         |                                                                                            |
| Costanza                         | Martino       |                      |                  |             |                                          |                                                         |                                                                                            |
| Hugues                           | Maréchal      |                      |                  |             |                                          |                                                         |                                                                                            |
| Julia                            | Mattern       |                      |                  |             |                                          |                                                         |                                                                                            |
| Catherine                        | McMahon       |                      |                  |             |                                          |                                                         |                                                                                            |
| Béla                             | Melegh        |                      |                  |             |                                          |                                                         |                                                                                            |
| David                            | Menon         |                      |                  |             |                                          |                                                         |                                                                                            |
| Tomas                            | Menovsky      |                      |                  |             |                                          |                                                         |                                                                                            |
| Ana                              | Mikolic       |                      |                  |             |                                          |                                                         |                                                                                            |
| Benoit                           | Misset        |                      |                  |             |                                          |                                                         |                                                                                            |
| Visakh                           | Muraleedharan |                      |                  |             |                                          |                                                         |                                                                                            |
| Lynnette                         | Murray        |                      |                  |             |                                          |                                                         |                                                                                            |
| Ancuta                           | Negru         |                      |                  |             |                                          |                                                         |                                                                                            |
| David                            | Nelson        |                      |                  |             |                                          |                                                         |                                                                                            |
| Virginia                         | Newcombe      |                      |                  |             |                                          |                                                         |                                                                                            |
| Daan                             | Nieboer       |                      |                  |             |                                          |                                                         |                                                                                            |
| József                           | Nyirádi       |                      |                  |             |                                          |                                                         |                                                                                            |
| Otesile                          | Olubukola     |                      |                  |             |                                          |                                                         |                                                                                            |
| Matej                            | Oresic        |                      |                  |             |                                          |                                                         |                                                                                            |
| Fabrizio                         | Ortolano      |                      |                  |             |                                          |                                                         |                                                                                            |
| Aarno                            | Palotie       |                      |                  |             |                                          |                                                         |                                                                                            |
| Paul M.                          | Parizel       |                      |                  |             |                                          |                                                         |                                                                                            |
| Jean-François                    | Payen         |                      |                  |             |                                          |                                                         |                                                                                            |
| Natascha                         | Perera        |                      |                  |             |                                          |                                                         |                                                                                            |
| Vincent                          | Perlberg      |                      |                  |             |                                          |                                                         |                                                                                            |
| Paolo                            | Persona       |                      |                  |             |                                          |                                                         |                                                                                            |

## Supplemental Online Content: Nonauthor Collaborators

| First Name and Middle Initial(s) | Last Name          | Suffix (eg, Jr, III) | Academic Degrees | Institution | Location (city, state/province, country) | Role or Contribution, eg, chair, principal investigator | Group (if more than 1 Group listed in the byline) and/or Subgroup (eg, Steering Committee) |
|----------------------------------|--------------------|----------------------|------------------|-------------|------------------------------------------|---------------------------------------------------------|--------------------------------------------------------------------------------------------|
| Wilco                            | Peul               |                      |                  |             |                                          |                                                         |                                                                                            |
| Anna                             | Piippo-Karjalainen |                      |                  |             |                                          |                                                         |                                                                                            |
| Matti                            | Pirinen            |                      |                  |             |                                          |                                                         |                                                                                            |
| Horia                            | Ples               |                      |                  |             |                                          |                                                         |                                                                                            |
| Suzanne                          | Polinder           |                      |                  |             |                                          |                                                         |                                                                                            |
| Inigo                            | Pomposo            |                      |                  |             |                                          |                                                         |                                                                                            |
| Jussi P.                         | Posti              |                      |                  |             |                                          |                                                         |                                                                                            |
| Louis                            | Puybasset          |                      |                  |             |                                          |                                                         |                                                                                            |
| Andreea                          | Radoi              |                      |                  |             |                                          |                                                         |                                                                                            |
| Arminas                          | Ragauskas          |                      |                  |             |                                          |                                                         |                                                                                            |
| Rahul                            | Raj                |                      |                  |             |                                          |                                                         |                                                                                            |
| Malinka                          | Rambadagalla       |                      |                  |             |                                          |                                                         |                                                                                            |
| Jonathan                         | Rhode              |                      |                  |             |                                          |                                                         |                                                                                            |
| Sylvia                           | Richardson         |                      |                  |             |                                          |                                                         |                                                                                            |
| Sophie                           | Richter            |                      |                  |             |                                          |                                                         |                                                                                            |
| Samuli                           | Ripatti            |                      |                  |             |                                          |                                                         |                                                                                            |
| Saulius                          | Rocka              |                      |                  |             |                                          |                                                         |                                                                                            |
| Cecilie                          | Roe                |                      |                  |             |                                          |                                                         |                                                                                            |
| Olav                             | Roise              |                      |                  |             |                                          |                                                         |                                                                                            |
| Jeffrey V.                       | Rosenfeld          |                      |                  |             |                                          |                                                         |                                                                                            |
| Christina                        | Rosenlund          |                      |                  |             |                                          |                                                         |                                                                                            |
| Guy                              | Rosenthal          |                      |                  |             |                                          |                                                         |                                                                                            |
| Rolf                             | Rossaint           |                      |                  |             |                                          |                                                         |                                                                                            |
| Sandra                           | Rossi              |                      |                  |             |                                          |                                                         |                                                                                            |
| Daniel                           | Rueckert           |                      |                  |             |                                          |                                                         |                                                                                            |
| Martin                           | Rusnák             |                      |                  |             |                                          |                                                         |                                                                                            |
| Juan                             | Sahuquillo         |                      |                  |             |                                          |                                                         |                                                                                            |
| Oliver                           | Sakowitz           |                      |                  |             |                                          |                                                         |                                                                                            |

## Supplemental Online Content: Nonauthor Collaborators

| First Name and Middle Initial(s) | Last Name      | Suffix (eg, Jr, III) | Academic Degrees | Institution | Location (city, state/province, country) | Role or Contribution, eg, chair, principal investigator | Group (if more than 1 Group listed in the byline) and/or Subgroup (eg, Steering Committee) |
|----------------------------------|----------------|----------------------|------------------|-------------|------------------------------------------|---------------------------------------------------------|--------------------------------------------------------------------------------------------|
| Renan                            | Sanchez-Porras |                      |                  |             |                                          |                                                         |                                                                                            |
| Janos                            | Sandor         |                      |                  |             |                                          |                                                         |                                                                                            |
| Nadine                           | Schäfer        |                      |                  |             |                                          |                                                         |                                                                                            |
| Silke                            | Schmidt        |                      |                  |             |                                          |                                                         |                                                                                            |
| Herbert                          | Schoechl       |                      |                  |             |                                          |                                                         |                                                                                            |
| Guus                             | Schoonman      |                      |                  |             |                                          |                                                         |                                                                                            |
| Rico Frederik                    | Schou          |                      |                  |             |                                          |                                                         |                                                                                            |
| Elisabeth                        | Schwendenwein  |                      |                  |             |                                          |                                                         |                                                                                            |
| Charlie                          | Sewalt         |                      |                  |             |                                          |                                                         |                                                                                            |
| Toril                            | Skandsen       |                      |                  |             |                                          |                                                         |                                                                                            |
| Peter                            | Smielewski     |                      |                  |             |                                          |                                                         |                                                                                            |
| Abayomi                          | Sorinola       |                      |                  |             |                                          |                                                         |                                                                                            |
| Emmanuel                         | Stamatakis     |                      |                  |             |                                          |                                                         |                                                                                            |
| Simon                            | Stanworth      |                      |                  |             |                                          |                                                         |                                                                                            |
| Robert                           | Stevens        |                      |                  |             |                                          |                                                         |                                                                                            |
| William                          | Stewart        |                      |                  |             |                                          |                                                         |                                                                                            |
| Ewout W.                         | Steyerberg     |                      |                  |             |                                          |                                                         |                                                                                            |
| Nino                             | Stocchetti     |                      |                  |             |                                          |                                                         |                                                                                            |
| Nina                             | Sundström      |                      |                  |             |                                          |                                                         |                                                                                            |
| Riikka                           | Takala         |                      |                  |             |                                          |                                                         |                                                                                            |
| Viktória                         | Tamás          |                      |                  |             |                                          |                                                         |                                                                                            |
| Tomas                            | Tamosuitis     |                      |                  |             |                                          |                                                         |                                                                                            |
| Mark Steven                      | Taylor         |                      |                  |             |                                          |                                                         |                                                                                            |
| Braden                           | Te Ao          |                      |                  |             |                                          |                                                         |                                                                                            |
| Olli                             | Tenovuo        |                      |                  |             |                                          |                                                         |                                                                                            |
| Alice                            | Theadom        |                      |                  |             |                                          |                                                         |                                                                                            |
| Matt                             | Thomas         |                      |                  |             |                                          |                                                         |                                                                                            |
| Dick                             | Tibboel        |                      |                  |             |                                          |                                                         |                                                                                            |

## Supplemental Online Content: Nonauthor Collaborators

| First Name and Middle Initial(s) | Last Name       | Suffix (eg, Jr, III) | Academic Degrees | Institution | Location (city, state/province, country) | Role or Contribution, eg, chair, principal investigator | Group (if more than 1 Group listed in the byline) and/or Subgroup (eg, Steering Committee) |
|----------------------------------|-----------------|----------------------|------------------|-------------|------------------------------------------|---------------------------------------------------------|--------------------------------------------------------------------------------------------|
| Marjolein                        | Timmers         |                      |                  |             |                                          |                                                         |                                                                                            |
| Christos                         | Tolias          |                      |                  |             |                                          |                                                         |                                                                                            |
| Tony                             | Trapani         |                      |                  |             |                                          |                                                         |                                                                                            |
| Cristina Maria                   | Tudora          |                      |                  |             |                                          |                                                         |                                                                                            |
| Andreas                          | Unterberg       |                      |                  |             |                                          |                                                         |                                                                                            |
| Peter                            | Vajkoczy        |                      |                  |             |                                          |                                                         |                                                                                            |
| Shirley                          | Vallance        |                      |                  |             |                                          |                                                         |                                                                                            |
| Egils                            | Valeinis        |                      |                  |             |                                          |                                                         |                                                                                            |
| Zoltán                           | Vámos           |                      |                  |             |                                          |                                                         |                                                                                            |
| Luc                              | van den Hauwe   |                      |                  |             |                                          |                                                         |                                                                                            |
| Mathieu                          | van der Jagt    |                      |                  |             |                                          |                                                         |                                                                                            |
| Joukje                           | van der Naalt   |                      |                  |             |                                          |                                                         |                                                                                            |
| Gregory                          | Van der Steen   |                      |                  |             |                                          |                                                         |                                                                                            |
| Jeroen T.J.M.                    | van Dijck       |                      |                  |             |                                          |                                                         |                                                                                            |
| Thomas A.                        | van Essen       |                      |                  |             |                                          |                                                         |                                                                                            |
| Wim                              | Van Hecke       |                      |                  |             |                                          |                                                         |                                                                                            |
| Caroline                         | van Heugten     |                      |                  |             |                                          |                                                         |                                                                                            |
| Dominique                        | Van Praag       |                      |                  |             |                                          |                                                         |                                                                                            |
| Thijs                            | Vande Vyvere    |                      |                  |             |                                          |                                                         |                                                                                            |
| Roel P. J.                       | van Wijk        |                      |                  |             |                                          |                                                         |                                                                                            |
| Alessia Vargiolu                 | van Wijk        |                      |                  |             |                                          |                                                         |                                                                                            |
| Emmanuel                         | Vega            |                      |                  |             |                                          |                                                         |                                                                                            |
| Kimberley                        | Velt            |                      |                  |             |                                          |                                                         |                                                                                            |
| Anne                             | Vik             |                      |                  |             |                                          |                                                         |                                                                                            |
| Rimantas                         | Vilcinis        |                      |                  |             |                                          |                                                         |                                                                                            |
| Victor                           | Volovici        |                      |                  |             |                                          |                                                         |                                                                                            |
| Nicole                           | von Steinbüchel |                      |                  |             |                                          |                                                         |                                                                                            |
| Daphne                           | Voormolen       |                      |                  |             |                                          |                                                         |                                                                                            |



Supplemental Online Content: Nonauthor Collaborators

| <b>First Name and Middle Initial(s)</b> | <b>Last Name</b> | <b>Suffix (eg, Jr, III)</b> | <b>Academic Degrees</b> | <b>Institution</b> | <b>Location (city, state/province, country)</b> | <b>Role or Contribution, eg, chair, principal investigator</b> | <b>Group (if more than 1 Group listed in the byline) and/or Subgroup (eg, Steering Committee)</b> |
|-----------------------------------------|------------------|-----------------------------|-------------------------|--------------------|-------------------------------------------------|----------------------------------------------------------------|---------------------------------------------------------------------------------------------------|
| Petar                                   | Vulekovic        |                             |                         |                    |                                                 |                                                                |                                                                                                   |
| Kevin K.W.                              | Wang             |                             |                         |                    |                                                 |                                                                |                                                                                                   |
| Eveline                                 | Wiegers          |                             |                         |                    |                                                 |                                                                |                                                                                                   |
| Guy                                     | Williams         |                             |                         |                    |                                                 |                                                                |                                                                                                   |
| Lindsay                                 | Wilson           |                             |                         |                    |                                                 |                                                                |                                                                                                   |
| Stefan                                  | Winzeck          |                             |                         |                    |                                                 |                                                                |                                                                                                   |
| Stefan                                  | Wolf             |                             |                         |                    |                                                 |                                                                |                                                                                                   |
| Zhihui                                  | Yang             |                             |                         |                    |                                                 |                                                                |                                                                                                   |
| Peter                                   | Ylén             |                             |                         |                    |                                                 |                                                                |                                                                                                   |
| Alexander                               | Younsi           |                             |                         |                    |                                                 |                                                                |                                                                                                   |
| Frederick A.                            | Zeiler           |                             |                         |                    |                                                 |                                                                |                                                                                                   |
| Veronika                                | Zelinkova        |                             |                         |                    |                                                 |                                                                |                                                                                                   |
| Agate                                   | Ziverte          |                             |                         |                    |                                                 |                                                                |                                                                                                   |
| Tommaso                                 | Zoerle           |                             |                         |                    |                                                 |                                                                |                                                                                                   |
